# Supplementary material for: Root and alveolar bone changes in first premolars adjacent to the traction of buccal versus palatal maxillary impacted canines
Source: PLoS One. 2019 Dec 10;14(12):e0226267. doi: 10.1371/journal.pone.0226267 (PMC6903742; doi:10.1371/journal.pone.0226267)
Supplement: S1 Database — (XLSX) [file pone.0226267.s001.xlsx]

## Sheet: DATABASE PREMOLARS
ID	SEX	AGE	SNA	SNB	ANB	APDI	LONGMAX	DURATION	POSITION	h	SECTOR	ALFA	BETA	UNIoBI	COMPLEXITY	PCSecTL.T0	PCSecTL.T1	CHANGPCSecTL	PCSecA.T0	PCSecA.T1	CHANGPCSecArea	MUAWT0	MUAWT1	CHANGEMUAW	BBHT0	BBHT1	ChangeBBH	PBHT0	PBHT1	ChangePBH	PATT0	PATT1	ChangePAT	BATT0	BATT1	ChangeBAT	PSagSecTL.T0	PSagSecTL.T1	CHANGPSagSecTL	PSagSecLAD.T0	PSagSecLAD.T1	PSagSecLBD.T0	PSagSecLBD.T1	PSagSecA.T0	PSagSecA.T1	CHANGPSagSecArea	PAxialSecACerv.T0	PAxialSecACerv.T1	CHANGPAxialSecACerv
1	0	12	89.57	85.14	4.43	82.94	48.7	6	0	11.3	3	32.7	28	0	0	11.1	13.2	-2.1	71.8	69.1	2.7	14.3	10.2	4.1	9.7	13.6	-3.9	7.9	10.6	-2.7	3.8	1.7	2.1	1.3	2.1	-0.8	13.3	13.9	-0.6	2.6	0.9	10.7	13	30.9	32.6	-1.7	24.5	27	-2.5
2	1	13	79.54	74.07	5.47	72.18	42.84	10	0	11.3	3	31.9	38.8	1	0	11.6	11.5	0.1	65.2	65.1	0.1	10.6	10.55	0.05	7.7	7.5	0.2	6.9	6.6	0.3	2.6	2.3	0.3	1.1	1	0.1	12.6	12	0.6	3.2	3	9.4	9.45	38.2	36.8	1.4	21.2	27.7	-6.5
3	1	13	79.54	74.07	5.47	72.18	42.84	10	0	11	3	33.9	34.1	1	0	11.5	11.5	0	57	56.8	0.2	11.6	11.65	-0.05	11.2	11.05	0.15	8.3	8.1	0.2	3.1	2.2	0.9	0	1	1	14	12.1	1.9	4.2	3.1	9.8	9.5	34.8	36.7	-1.9	21.3	27.6	-6.3
4	1	12	83	82	1	81	51.11	8.5	0	9.6	2	42.7	60.3	1	0	13.8	14	-0.2	74.6	73.4	1.2	11.2	12.9	-1.7	10.1	8	2.1	7.8	5.8	2	3.9	3.7	0.2	0.8	0.6	0.2	13.8	14.9	-1.1	3.8	3.7	11	11.2	40.5	40.4	0.1	24.7	25.6	-0.9
5	1	12	83	82	1	81	51.11	8	0	15.3	4	65.7	52.5	1	1	12.9	12.9	0	77.9	76.9	1	12.9	10.6	2.3	10.9	10.6	0.3	8.9	8.3	0.6	3.3	3.6	-0.3	1	1.8	-0.8	12.8	12.5	0.3	3.7	3	9.7	9.4	36.2	37.3	-1.1	24.6	24.7	-0.1
6	0	21	77.2	74.97	2.23	83.9	50.8	7	0	12.5	3	50	30.2	0	1	9.8	9	0.8	72	55.2	16.8	14.7	10.1	4.6	12.1	12.3	-0.2	8.6	8.3	0.3	3.4	0	3.4	2.4	1.2	1.2	10.9	9.3	1.6	1.3	1.5	9.6	7.8	40.1	34.4	5.7	40.2	34.8	5.4
7	0	21	77.2	74.97	2.23	83.9	50.8	7	0	12.8	2	55.4	67.1	0	0	9.8	8.6	1.2	67.6	55.3	12.3	12.25	12.2	0.05	11.4	10.7	0.3	8.4	8.3	0.1	3.8	2.3	1.5	1.2	1.1	0.1	10.7	9.3	1.4	2	1.1	8.7	8.2	41.5	37.4	4.1	35.5	35.3	0.2
8	1	14	90.91	84.22	6.69	82.42	47.51	6	0	11	3	19.7	6.7	0	0	13.2	13.2	0	79.9	79.6	0.3	12.27	12.26	0.01	11.4	10.6	0.8	8.3	8.2	0.1	3.7	2.1	1.6	1.2	1	0.2	15.9	12.1	3.8	4.3	3.1	11.6	9.4	41	36.8	4.2	23.3	27.7	-4.4
9	0	12	77.69	72.12	5.57	73.79	50.16	9	0	13	4	65.2	81.6	1	1	7.1	6.3	0.8	45	44.9	0.1	8.9	8.8	0.1	11.1	10.3	0.8	9.2	8.1	1.1	1.8	1.3	0.5	1.3	1.1	0.2	7.7	6.4	1.3	1.5	3	6.2	9.3	25.4	23.5	1.9	31.9	34.5	-2.6
10	0	12	77.69	72.12	5.57	73.79	50.16	9	0	13.4	4	76.3	81.5	1	1	6.5	6.9	-0.4	42.4	42.3	0.1	13.1	12.2	0.9	12.6	12.2	0.4	7.8	9.8	-2	0.9	0	0.9	2.1	0	2.1	6.9	6.1	0.8	3.8	3.2	9.7	9.5	25.3	24.2	1.1	32.4	35.3	-2.9
11	0	15	81.9	77.03	4.87	80.96	51.7	16	0	21.9	5	81.4	90.2	0	1	13.1	11.7	1.4	83	81.2	1.8	13.9	13.6	0.3	12.7	12	0.7	6.2	8.8	-2.6	3.7	2.3	1.4	0.8	1.4	-0.6	12.9	10.9	2	7.1	6.3	5.8	4.6	38.6	37.1	1.5	37	37.8	-0.8
12	0	39	83	79.5	3.5	82	50	6	0	9.1	3	32.7	47.4	0	0	9.1	8.9	0.2	60.6	66	-5.4	10.1	9.2	0.9	15.3	14.1	1.2	8.2	8.1	0.1	3.8	2.3	1.5	1.9	0.9	1	10.9	10.6	0.3	1.5	1.1	9.4	9.5	35.3	36.5	-1.2	37.4	38.2	-0.8
13	0	12	82	77.5	4.5	78	43	9	0	15.8	2	34.5	26.9	0	0	10.9	10.5	0.4	46.1	58.3	-12.2	14.7	12.7	2	10.6	8.8	1.8	7.7	7.1	0.6	3.8	3.5	0.3	1.2	1.1	0.1	12.9	11.8	1.1	1.4	1.7	11.5	10.1	44.9	41.2	3.7	31.3	34.6	-3.3
14	1	14	88.82	84.82	4	80.92	50.38	8	1	14.1	5	75.2	76.4	0	1	11.4	13	-1.6	64.2	59.9	4.3	10.2	9.1	1.1	11.3	11.1	0.2	7	9.3	-2.3	2.8	0.5	2.3	1	2.7	-1.7	15.2	15.5	-0.3	4.9	5	11.2	10.5	40.5	46.7	-6.2	17.3	20.6	-3.3
15	1	17	87.8	87.4	0.4	88.46	45.05	4	1	9.4	4	51.9	49.5	0	1	9.1	8.9	0.2	48.9	46.4	2.5	8.5	7.7	0.8	9.6	5	4.6	6.8	4.2	2.6	0.9	0	0.9	0.8	0	0.8	11.3	9.7	1.6	7.6	1.5	3.7	8.2	24.1	23.5	0.6	26.4	25.6	0.8
16	0	17	89.3	84.63	4.67	79.33	54.12	5	1	9.4	4	56.9	57.2	1	1	14.9	15.6	-0.7	74.1	85.5	-11.4	14.2	14.3	-0.1	15.5	15.3	0.2	10.3	10.6	-0.3	4.6	2.6	2	1.4	1.5	-0.1	15.2	15.7	-0.5	3.8	3	9.7	9.5	45.3	54.8	-9.5	19.2	25.3	-6.1
17	0	17	89.3	84.63	4.67	79.33	54.12	5	1	9.8	4	52.2	51.2	1	1	16.5	16.4	0.1	70.1	64.8	5.3	15.3	14.9	0.4	11.4	11.2	0.2	3.9	7.3	-3.4	6.5	4.1	2.4	0.8	0.3	0.5	17.1	16.1	1	1.9	1	15.2	15.1	53	53.6	-0.6	18.9	22.2	-3.3
18	1	18	80.78	78.81	1.97	89.23	45.01	8	1	6.9	3	51	48.4	1	1	11.2	10.1	1.1	43.7	56	-12.3	12	10.4	1.6	9.4	8.5	0.9	10	8	2	3.1	1.4	1.7	1	0.9	0.1	11.6	11.1	0.5	3.8	1.4	9.8	9.7	30.7	34.7	-4	27.6	25.7	1.9
19	1	18	80.78	78.81	1.97	89.23	45.01	8	1	7.7	3	38.3	39.2	1	0	11.6	10.7	0.9	63.2	47.4	15.8	12.9	12.6	0.3	11.8	10	1.8	8	4.7	3.3	3.7	2	1.7	1.1	1.5	-0.4	11.2	11.1	0.1	3.7	3	9.7	9.4	29.6	36.5	-6.9	25.8	29	-3.2
20	0	28	83	79	4	85.5	54.3	10	1	10.6	4	57.5	18.7	0	1	16.3	12.8	3.5	37.1	53.3	-16.2	9.4	10.8	-1.4	11.9	11.2	0.7	10.5	10.3	0.2	3.3	3.7	-0.4	2.2	1.9	0.3	14.7	14.7	0	3.8	4.4	9.85	10.3	47.7	50	-2.3	16.9	23.7	-6.8
21	1	21	82.49	81	1.49	79.24	44.7	7	1	9.4	4	50.3	44.9	0	1	11.75	12.3	-0.55	79.8	79.4	0.4	14	11.5	2.5	11.6	12.2	-0.6	9	6.7	2.3	7.3	2.8	4.5	0.8	0.9	-0.1	13.2	12.7	0.5	3.6	3.1	9.75	9.4	37.5	34.3	3.2	14.3	24.8	-10.5
22	0	15	79.73	79.32	0.41	86.23	52.76	4	1	8.8	1	15.6	31.7	0	0	11.7	10.3	1.4	70.7	67.5	3.2	9.3	8.7	0.6	7.5	8.9	-1.4	5.2	7	-1.8	2.9	1.4	1.5	1.1	1	0.1	12.7	12.5	0.2	5.1	3.8	7.6	8.7	33.9	33.9	0	20.6	23.2	-2.6
23	1	15	89.13	83.48	5.65	79.96	50.17	15	1	8.3	2	34.6	43.4	1	0	9.4	10.8	-1.4	49.9	51.8	-1.9	10.6	8	2.6	10.4	11.2	-0.8	7.2	6.4	0.8	3.3	1.6	1.7	1.5	1.8	-0.3	11.1	11.1	0	2.4	3.2	8.7	9.4	28.8	26.6	2.2	16	13.3	2.7
24	1	15	89.13	83.48	5.65	79.96	50.17	15	1	7.7	3	35	44.7	1	0	10.2	10.3	-0.1	51.9	49	2.9	11.8	9.3	2.5	11.4	9.2	2.2	7.9	10.7	-2.8	6.5	3.4	3.1	0.9	0.9	0	13.5	11	2.5	4	1.2	9.5	9.8	27.6	27	0.6	13	16.9	-3.9
25	1	15	89.38	87.79	1.59	88.87	43.14	5	1	7	3	36.4	36.9	0	0	12.9	11.6	1.3	72.4	62	10.4	11.8	9.9	1.9	11.4	10.9	0.5	8.1	6.8	1.3	5.5	4.7	0.8	0.9	0.2	0.7	12.8	12.3	0.5	1.4	8.1	11.6	4.2	34.2	36.4	-2.2	20.5	19.3	1.2
26	1	32	90	82.31	7.69	78.95	50	6	1	10.8	4	54.1	46.3	0	1	12.3	12.3	0	71.9	71.8	0.1	12.2	12.35	-0.15	11.4	10.8	0.6	8.4	8.3	0.1	3.8	2.3	1.5	1.3	1	0.3	16.2	12	4.2	6.7	3.2	9.5	9.3	37.8	36.8	1	19.1	27.6	-8.5
27	0	14	83	79	4	81	47.22	8	1	9.5	4	45.02	44.34	0	1	14.3	12.4	1.9	92.3	83.7	8.6	11.5	12.3	-0.8	12.7	13.4	-0.7	11.3	8.2	3.1	2.8	1.5	1.3	1.2	1.6	-0.4	16.1	13.3	2.8	5.2	5	10.9	8.3	51.9	38.7	13.2	28.6	33.7	-5.1
28	0	36	91.15	89.27	1.88	93.63	56.12	8	1	10.2	4	39.6	52.8	1	1	14.5	12.6	1.9	84.8	70	14.8	13.9	11.9	2	13	9.2	3.8	8	6.5	1.5	5.5	4.8	0.7	2	1	1	13.9	11.8	2.1	3	1.2	10.9	10.6	31.9	32.3	-0.4	24.9	28.9	-4
29	0	36	91.15	89.27	1.88	93.66	56.12	8	1	9.3	5	49.7	48.9	1	1	15.9	12.7	3.2	99	88.7	10.3	14.7	15.4	-0.7	10.6	10.7	-0.1	11.1	10.4	0.7	4.7	5.6	-0.9	0.7	0.4	0.3	15.2	13	2.2	3	6.6	12.2	6.4	36.3	38.9	-2.6	34.1	31.8	2.3
30	0	21	80.35	82.3	-1.95	89.16	45.06	4	1	7.4	1	18.2	18.8	0	0	15.2	12.6	2.6	94.2	87.6	6.6	16.8	11.8	5	14.4	8.1	6.3	12.6	4.2	8.4	6	3.3	2.7	1.9	1	0.9	14.2	13.4	0.8	3.8	2.4	9.7	11	49.1	41.1	8	24.1	31.6	-7.5
31	1	12	94	90	4	87	47.5	6	1	7.2	3	44.2	43.5	0	1	10.2	11.7	-1.5	72.4	73.9	-1.5	13.1	10.6	2.5	12.2	11.9	0.3	7.8	7.9	-0.1	3.1	1.7	1.4	0.6	0.4	0.2	11.8	12.9	-1.1	2.4	3.6	9.4	9.3	35.9	38.1	-2.2	26.9	25.2	1.7
32	0	25	90	81.5	8.5	82	54.5	8	1	6.3	3	38	48.5	1	0	14.2	14.2	0	83.5	82.4	1.1	12.25	12.22	0.03	11.3	10.7	0.6	8.3	8.2	0.1	3.8	2.4	1.4	1.2	1	0.2	15.7	12.1	3.6	4.6	3	11.1	9.5	41.8	36.7	5.1	19.1	27.6	-8.5
33	0	25	90	81.5	8.5	82	54.5	8	1	6.8	3	30.3	36.2	1	0	12.5	12.5	0	78.9	77.3	1.6	12.15	12.08	0.07	11.5	10.5	1	8.4	8.3	0.1	3.7	2.3	1.4	1.3	1.1	0.2	17.1	12	4.1	7.5	3.1	9.6	9.4	41.6	36.8	4.8	18.3	27.7	-9.4
34	1	31	83.5	83.5	0	90	54.5	6	1	6.9	2	34.6	25.2	0	0	14.6	13.6	1	72.5	89.9	-17.4	9.8	9.8	0	11.8	12	-0.2	11.5	8.1	3.4	4.1	1.1	3	1.2	0.7	0.5	15.4	14.2	1.2	7	2.2	8.4	12	43.4	38.5	4.9	25.7	26.5	-0.8
[truncated: 6 more columns]

## Sheet: Nomenclature
ID	IDENTIFICATION
SEX	SEX	0, MAN; 1, WOMEN
AGE	AGE
SNA	SNA
SNB	SNB
ANB	ANB
APDI	APDI
LONGMAX	MAXILLARY LENGTH
DURATION	DURATION
POSITION	CANINE POSITION	0,BUCCAL; 1, PALATINE
h	HEIGHT TO OCLUSAL PLANE
SECTOR	IMPACTATION SECTOR
ALFA	ALFA ANGLE
BETA	BETA ANGLE
UNIoBI	UNI O BILATERAL	0, UNILATERAL; 1, BILATERAL
COMPLEXITY	ALFA MAJOR OR MINOR ANGLE AT 40 °	0, NOT COMPLEX; 1, COMPLEX
PCSecTL.T0	PAMIC CORONAL SECTION TOTAL LENGTH IN T0
PCSecTL.T1	PAMIC CORONAL SECTION TOTAL LENGTH IN T1
CHANGPCSecTL	PAMIC CHANGE CORONAL SECTION TOTAL LENGTH
PCSecA.T0	PAMIC CORONAL SECTION AREA IN T0
PCSecA.T1	PAMIC CORONAL SECTION AREA IN T1
CHANGPCSecArea	PAMIC CHANGE CORONAL SECTION AREA
MUAWT0	MAXIMUM UPPER ALVEOLAR WIDTH IN T0
MUAWT1	MAXIMUM UPPER ALVEOLAR WIDTH IN T1
CHANGEMUAW	CHANGE IN MAXIMUM UPPER ALVEOLAR WIDTH
BBHT0	BUCCAL BONE HEIGHT IN T0
BBHT1	BUCCAL BONE HEIGHT IN T1
ChangeBBH	CHANGE IN BUCCAL BONE HEIGHT
PBHT0	PALATAL BONE HEIGHT IN T0
PBHT1	PALATAL BONE HEIGHT IN T1
ChangePBH	CHANGE IN PALATAL BONE HEIGHT
PATT0	PALATAL ALVEOLAR THICKNESS IN T0
PATT1	PALATAL ALVEOLAR THICKNESS IN T1
ChangePAT	CHANGE IN PALATAL ALVEOLAR THICKNESS
BATT0	BUCCAL ALVEOLAR THICKNESS IN T0
BATT1	BUCCAL ALVEOLAR THICKNESS IN T1
ChangeBAT	CHANGE IN BUCCAL ALVEOLAR THICKNESS
PSagSecTL.T0	PAMIC SAGITAL SECTION TOTAL LENGTH IN T0
PSagSecTL.T1	PAMIC SAGITAL SECTION TOTAL LENGTH IN T1
CHANGPSagSecTL	PAMIC CHANGE SAGITAL SECTION TOTAL LENGTH
PSagSecLAD.T0	PAMIC SAGITAL SECTION LENGTH AFTER DILACERATION IN T0
PSagSecLAD.T1	PAMIC SAGITAL SECTION LENGTH AFTER DILACERATION IN T1
PSagSecLBD.T0	PAMIC SAGITAL SECTION LENGTH BEFORE DILACERATION IN T0
PSagSecLBD.T1	PAMIC SAGITAL SECTION LENGTH BEFORE DILACERATION IN T1
PSagSecA.T0	PAMIC SAGITAL SECTION AREA IN T0
PSagSecA.T1	PAMIC SAGITAL SECTION AREA IN T1
CHANGPSagSecArea	PAMIC CHANGE SAGITAL SECTION AREA
PAxialSecACerv.T0	PAMIC AXIAL SECTION AREA CERVICAL IN T0
PAxialSecACerv.T1	PAMIC AXIAL SECTION AREA CERVICAL IN T1
CHANGPAxialSecACerv	CHANGE IN PAMIC AXIAL SECTION AREA CERVICAL
PAxialSecAMiddle.T0	PAMIC AXIAL SECTION AREA MIDDLE IN T0
PAxialSecAMiddle.T1	PAMIC AXIAL SECTION AREA MIDDLE IN T1
CHANGPAxialSecAMiddle	CHANGE IN PAMIC AXIAL SECTION AREA MIDDLE
PAxialSecACurve.T0	PAMIC AXIAL SECTION AREA IN CURVE IN T0
PAxialSecACurve.T1	PAMIC AXIAL SECTION AREA IN CURVE IN T1
CHANGPAxialSecACurve	CHANGE IN PAMIC AXIAL SECTION AREA IN CURVE
